# Supplementary material for: Truxene-based porous polymers: from synthesis to catalytic activity
Source: Royal Society of Chemistry journal article supplement (doi:10.1039/c8py01082j), 2018-01-01
Supplement: c8py01082j1.pdf [file c8py01082j1.pdf]

## Supporting information

# Truxene-based porous polymers: From synthesis to catalytic activity

### Table of contents

|                                                                                          |    |
|------------------------------------------------------------------------------------------|----|
| Figure S1. Photographs and microphotographs of polymers                                  | S2 |
| Figure S2. FT-IR spectra of TxMe, TxPP and TxBnPP                                        | S2 |
| Table S1. Elemental analysis of hexamethyl-truxene based porous polymers                 | S3 |
| Table S2. Porous properties of TxPPs prepared from FeCl <sub>3</sub>                     | S4 |
| Figure S3. Pore distribution of polymers by N <sub>2</sub> -DFT methods                  | S4 |
| Figure S4. TGA of TxPP in argon and oxygen atmosphere                                    | S4 |
| Figure S5. Powder XRD of TxPP                                                            | S5 |
| Figure S6. TGA of functionalized TxPP in oxygen atmosphere                               | S5 |
| Figure S7 EDX analysis for TxPP-NH <sub>2</sub>                                          | S6 |
| Figure S8. Kinetic profile for TxPP-photocatalyzed oxidative coupling of benzylamine     | S7 |
| Figure S9. Kinetic profile for TxPP-SO <sub>3</sub> H-catalyzed esterification reactions | S7 |
| Figure S10. Hot filtration experiment                                                    | S7 |
| Figure S11. FTIR spectrum of recovered catalyst after photocatalytic reaction.           | S8 |
| Table S3. Tandem deprotection-Knoevenagel Condensation Cascade Reaction                  | S9 |

**Figure S1.** Photographs and microphotographs obtained with a Nikon microscope Eclipse LV 100 POL of polymers TxPP (a,b) and TXBNPP (c,d)

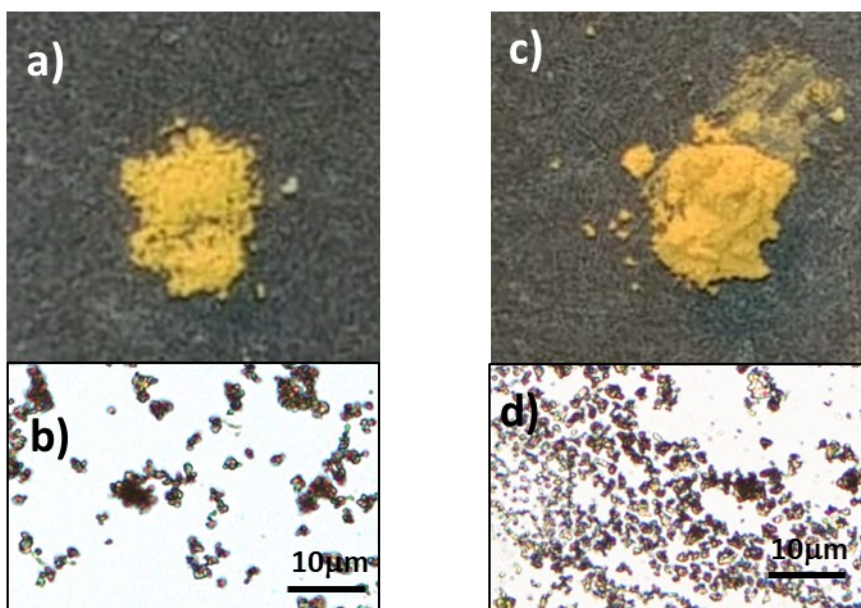

**Figure S2.** Comparison of the FT-IR spectra of the new porous polymers (TxPP and TxBnPP) with that of the monomer TXMe.

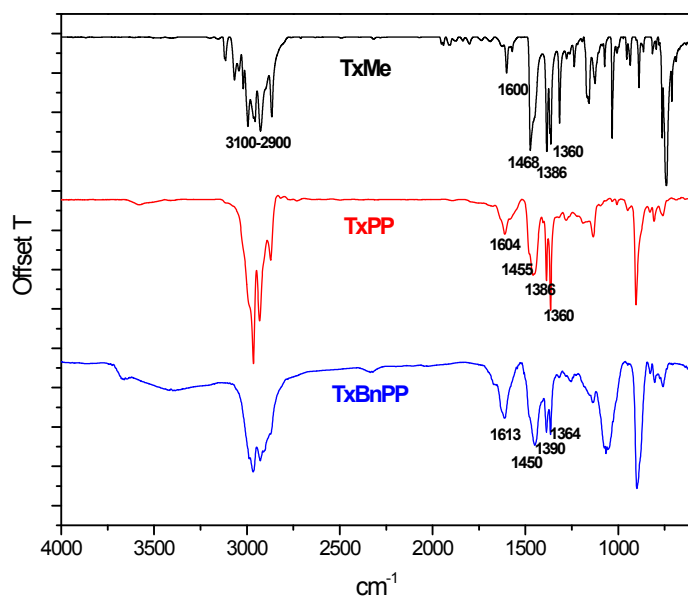

**Table S1.** Elemental analysis of hexamethyl-truxene based porous polymers.

| Material                                                               | Yield (%) | Exp. (%) |      |      |      |
|------------------------------------------------------------------------|-----------|----------|------|------|------|
|                                                                        |           | C        | H    | N    | S    |
| TxPP (Calculated for C <sub>36</sub> H <sub>33</sub> as repeat unit)   |           | 92.30    | 7.05 |      |      |
| TxPP (FeCl <sub>3</sub> )                                              | 90        | 80.40    | 6.70 | -    | -    |
| TxPP (AlCl <sub>3</sub> )                                              | 99        | 85.26    | 6.80 | -    | -    |
| TxPP-SO <sub>3</sub> H                                                 |           | 61.13    | 5.54 | -    | 5.16 |
| TxPP-SO <sub>3</sub> H-NO <sub>2</sub>                                 |           | 59.66    | 5.26 | 1.76 | 3.03 |
| TxPP-SO <sub>3</sub> H-NH <sub>2</sub>                                 |           | 61.81    | 5.30 | 1.51 | 2.49 |
| TxPP-NO <sub>2</sub>                                                   |           | 66.13    | 4.54 | 3.46 | -    |
| TxPP-NH <sub>2</sub>                                                   |           | 57.43    | 4.57 | 2.51 | -    |
|                                                                        |           |          |      |      |      |
| TxBnPP (Calculated for C <sub>45</sub> H <sub>39</sub> as repeat unit) |           | 93.75    | 6.25 |      |      |
| TxBnPP (FeCl <sub>3</sub> )                                            | 90        | 80.00    | 4.51 | -    |      |
| TxBnPP (AlCl <sub>3</sub> )                                            | 99        | 86.62    | 5.69 | -    | -    |

**Table S2.** Porous properties of PPs based on hexamethyl-truxene prepared from FeCl<sub>3</sub>.

| Polymer                     | S <sub>BET</sub> (m <sup>2</sup> .g <sup>-1</sup> ) | Pore volume (cm <sup>3</sup> .g <sup>-1</sup> ) <sup>a</sup> | Pore size (nm) |
|-----------------------------|-----------------------------------------------------|--------------------------------------------------------------|----------------|
| TxPP (FeCl <sub>3</sub> )   | 852                                                 | 0.639                                                        | 3.00           |
| TxBnPP (FeCl <sub>3</sub> ) | 835                                                 | 0.732                                                        | 3.50           |

<sup>a</sup> At P/P<sub>0</sub>= 0.987

**Figure S3.** Pore distribution of polymers by N<sub>2</sub>-DFT methods

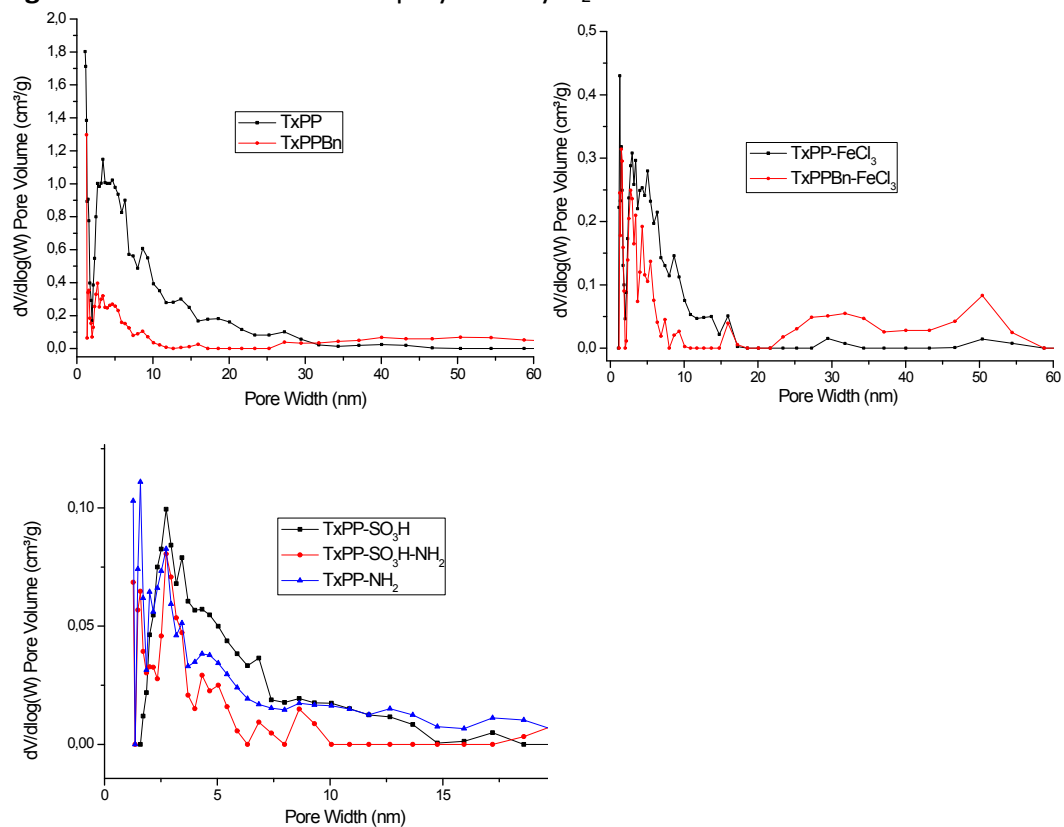

Figure S4. TGA of TxPP in argon and oxygen atmosphere

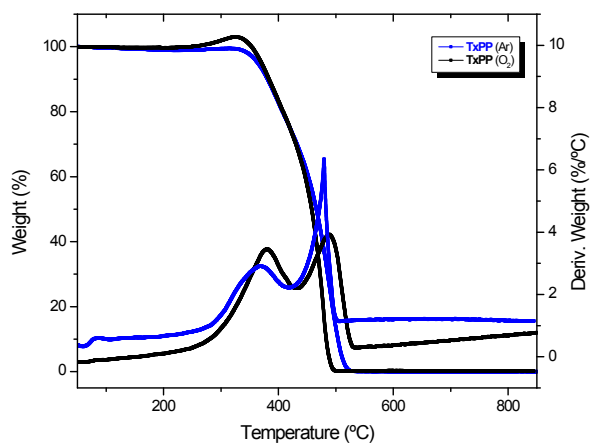

Figure S5. Powder XRD of TxPP.

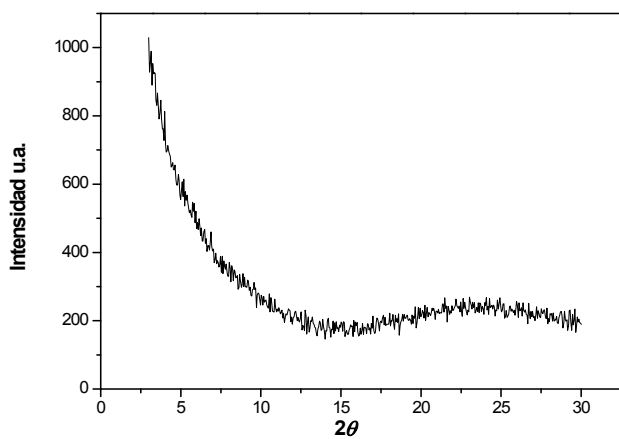

Figure S6. TGA of functionalized TxPP in oxygen atmosphere

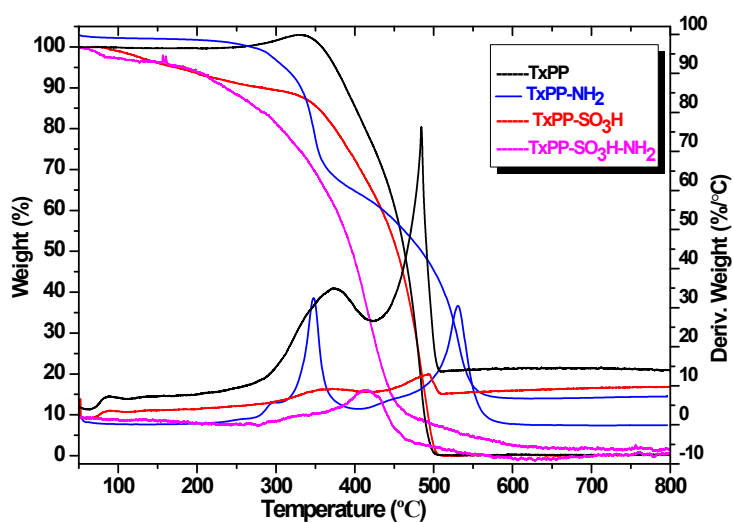

**Figure S7.** EDX analysis for TxPP-NH<sub>2</sub>

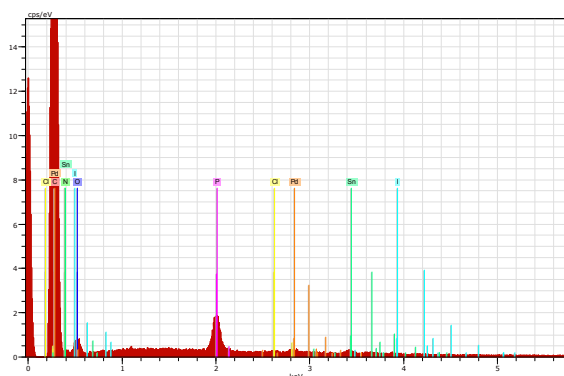

| El     | AN | Series   | unn. C<br>[wt.%] | norm. C<br>[wt.%] | Atom. C<br>[at.%] | Error<br>[wt.%] |
|--------|----|----------|------------------|-------------------|-------------------|-----------------|
| C      | 6  | K-series | 91.90            | 91.90             | 95.17             | 10.1            |
| N      | 7  | K-series | 0.00             | 0.00              | 0.00              | 0.0             |
| O      | 8  | K-series | 5.07             | 5.07              | 3.94              | 0.9             |
| P      | 15 | K-series | 1.82             | 1.82              | 0.73              | 0.1             |
| Cl     | 17 | K-series | 0.10             | 0.10              | 0.03              | 0.0             |
| Sn     | 50 | L-series | 0.35             | 0.35              | 0.04              | 0.0             |
| I      | 53 | L-series | 0.26             | 0.26              | 0.03              | 0.0             |
| Total: |    |          | 100.00           | 100.00            | 100.00            |                 |

## Catalytic activity

**Figure S8.** Kinetic profile for TxPP-photocatalyzed oxidative coupling of benzylamine, effect of polymer.

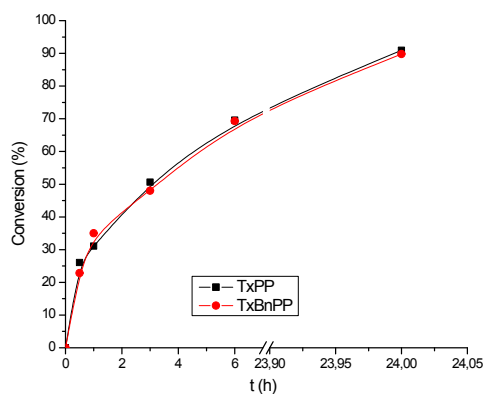

**Figure S9.** Kinetic profile for TxPP-SO<sub>3</sub>H-catalyzed esterification: a) effect of alcohol, b) Influence of chain length.

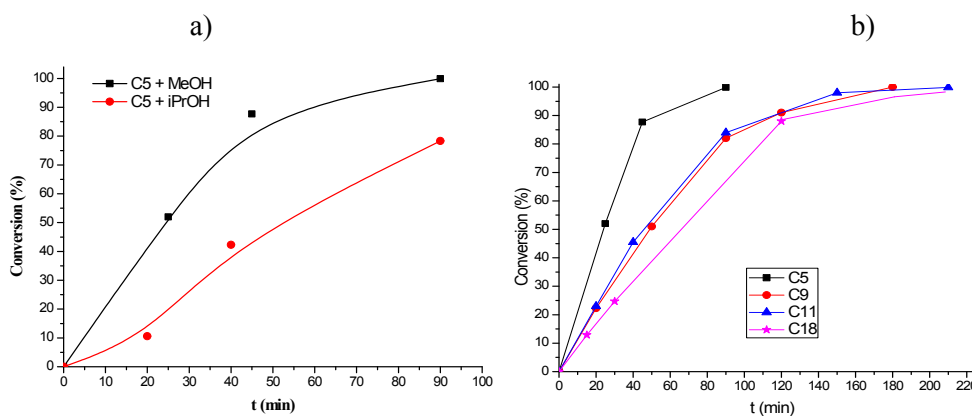

**Figure S10.** Hot filtration experiment.

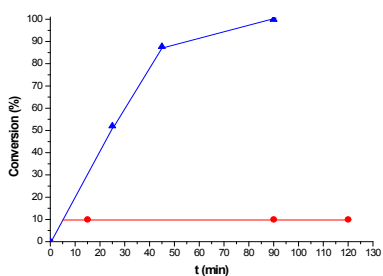

**Figure S11.** FTIR spectrum of recovered catalyst after photocatalytic reaction.

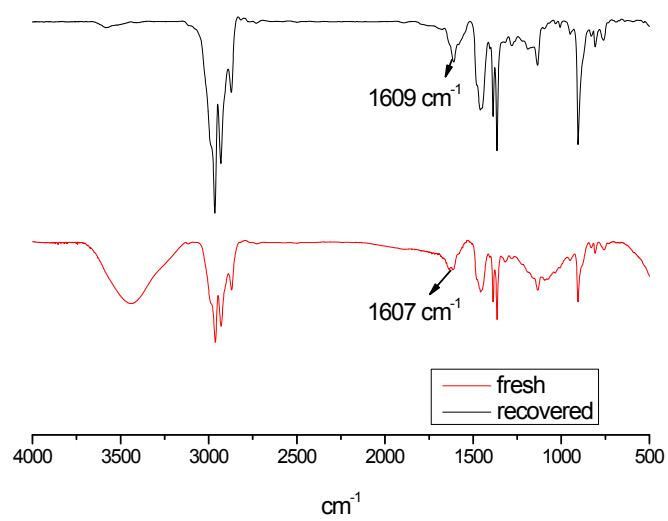



**Table S3. Tandem deprotection-Knoevenagel Condensation Cascade Reaction.**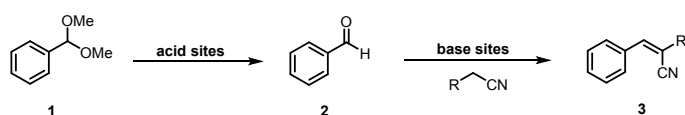

| Entry | Catalyst                                                                          | R               | t (h) | Conversion (%) |       | Yield GC (%) |  |
|-------|-----------------------------------------------------------------------------------|-----------------|-------|----------------|-------|--------------|--|
|       |                                                                                   |                 |       | 4              | 5     | 6            |  |
| 1     | TxPP-SO <sub>3</sub> H-NH <sub>2</sub> <sup>a</sup>                               | CN              | 1     | 100            | 31.5  | 68.5         |  |
| 2     | TxPP-SO <sub>3</sub> H-NH <sub>2</sub> <sup>a</sup>                               | -               | 20    | -              | -     | 100          |  |
| 3     | PPAF-SO <sub>3</sub> H-NH <sub>2</sub> <sup>1</sup>                               | CN              | 1     | 100            | 0     | 100          |  |
| 4     | 30-MLHM-NH <sub>2</sub> -SO <sub>3</sub> H <sup>2</sup>                           | COOEt           | 18    | 97             | 4.5   | 91.9         |  |
| 5     | MONNs-SO <sub>3</sub> H-NH <sub>2</sub> <sup>3</sup>                              | CN              | 2     | 99             | 0     | 99           |  |
| 6     | TxPP-SO <sub>3</sub> H + TxPP-NH <sub>2</sub> <sup>a</sup>                        | CN              | 1     | 100            | 24.8  | 75.2         |  |
| 7     | PPAF-SO <sub>3</sub> H + PPAF-NH <sub>2</sub> <sup>1</sup>                        | CN              | 1     | 100            | 9     | 91           |  |
| 8     | PPAF1-SO <sub>3</sub> H+PPAF1-NH <sub>2</sub> <sup>4</sup>                        | CN              | 1     | 100            | 13    | 87           |  |
| 9     | HCPs-SO <sub>3</sub> H-50 + HCPs-CH <sub>2</sub> NH <sub>2</sub> -50 <sup>5</sup> | CN <sup>d</sup> | 7     | 100            | trace | 97           |  |
| 10    | MONNs-SO <sub>3</sub> H + MONNs-NH <sub>2</sub> <sup>3</sup>                      | CN              | 2     | 98             | 6     | 92           |  |
| 9     | PTSA + Aniline <sup>b</sup>                                                       | CN              | 10    | 94             | 70    | 24           |  |
| 10    | IR-120 + A-21 <sup>c</sup>                                                        | CN              | 10    | 10             | 0     | 10           |  |
| 11    | TxPP <sup>a</sup>                                                                 | CN              | 24    | -              | -     | -            |  |

<sup>a</sup>Reaction conditions: benzaldehyde dimethyl acetal (0.36 mmol), malononitrile (0.43 mmol), catalyst (10 mol% referred to base sites), toluene (2 mL) + H<sub>2</sub>O (25 μL), 90°C; <sup>b</sup>p-toluen sulfonic acid (PTSA, 10 mol%) + Aniline (10 mol%); <sup>c</sup>10 mol%substract, <sup>d</sup>2-(2-bromophenyl)-1,3-dioxolane.

<sup>1</sup> E. Merino, E. Verde-Sesto, E. M. Maya, A. Corma, M. Iglesias, F. Sánchez *Applied Catalysis A: General* 2014, **469**, 206–212.

<sup>2</sup> A. Gaona, U. Díaz, A. Corma *Chem. Mater.* 2017, **29**, 1599–1612.

<sup>3</sup> T.Wang, Y. Xu, Z. He, H. Zhang, L. Xiong, M. Zhou, W. Yu, B. Shi, K. Huang *Macromol. Chem. Phys.*, 2017, DOI: 10.1002/macp.201600431

<sup>4</sup> E. Merino, E. Verde-Sesto, E. M. Maya, M. Iglesias, F. Sánchez, *Chem. Mat.* 2013, **25**, 981–988.

<sup>5</sup> K. Wang, Z. Jia, X. Yang, L. Wang, Y. Gu, B. Tan *J. of Catal.* 2017, **348**, 168–176.
